# Supplementary material for: The effects of biological sex on fatigue during and recovery from resistance exercise
Source: PeerJ. 2026 Jan 8;14:e20542. doi: 10.7717/peerj.20542 (PMC12790778; doi:10.7717/peerj.20542)
Supplement: Supplemental Information 1 [file peerj-14-20542-s001.xlsx]

## Sheet: Primary
Subject	Sex	Hormonal contraceptive	Day of cycle during visit 1	Age (years)	Bench press 1RM (lb)	Bench press 1rm (kg)	Velocity at 1RM	Bench Press IPF points	Body mass (kg)	Height (cm)	BMI	DXA LBM	DXA bf%	DXA arm lean mass	FFMI	BMD	BMD z-score	PSQI seven component score	PSQ score	Training yrs	Bench press yrs	Bench press freq	Bench press sets/wk	Bench press sets of <5 reps	Bench press sets of 5-15 reps	Bench press sets of >15 reps	proportion >5 reps	Bench press rest interval (minutes)	Primary goal (1=growth, 2=endurance, 3=strength)	Bench press 75% 1RM to failure	Total reps performed during fatigue protocol	Pre lactate	Post lactate	Change in lactate	Bench stroke length (cm)	Sleep duration 4	Sleep duration 5	Sleep duration 6	Sleep quality 4	Sleep quality 5	Sleep quality 6	Pecs VAS 4	Pecs VAS 5	Pecs VAS 6	Triceps VAS 4	Triceps VAS 5	Triceps VAS 6	Anterior Deltoid VAS 4	Anterior Deltoid VAS 5
1	Male			31.6968	405	183.705	0.08	628.746	108.4	175.2	35.3152	78.71	0.262	11.87	25.6426	1.623	3.5	3	19	13	13	4	14	0.36	0.64	0	0.64	1	3	10	22	0.8	8.6	7.8	11.13	8	9	8	48	50	57	35	32	25	3	16	30	44	39
2	Male			21.2982	207	93.8936	0.06	400.518	77.6	179.3	24.138	59.97	0.221	8.36	18.6541	1.246	0.6	3	11	2	2	2	16	0.5	0.5	0	0.5	2	3	10	33	0.9	7.7	6.8	13.74	8	7	8	78	31	96	38	11	0	16	0	0	65	15
3	Female	yaz	9	26.0676	105	47.6272	0.16	387.227	76.3	169.7	26.4948	52.19	0.309	6.09	18.1227	1.284	2.1	4	14	3	3	1.5	12	0.5	0.25	0.25	0.5	1.5	3	10	64	0.8	4.4	3.6	15.45	7	8	7	99	88	88	61	22	0	0	0	0	12	0
4	Male			20.318	220	99.7903	0.13	424.941	77.8	175.7	25.2021	63.69	0.174	9.5	20.6314	1.254	-0.1	4	16	3	3	3	9	0.1	0.7	0.2	0.9	1.5	3	6	53	1.2	6.3	5.1	16.21	8.5	6	8	54	77	79	75	45	31	10	10	4	68	83
5	Female	trisprintec	22	20.266	122	55.3383	0.08	469.288	62.1	158.6	24.688	43.71	0.29	4.75	17.377	1.108	0.2	3	22	2.5	2.5	2	10	0.2	0.8	0	0.8	1.5	1	9	124	2.1	4.7	2.6	13.78	5.5	8	6.5	100	58	88	50	25	2	20	10	10	41	18
6	Male			27.3243	305	138.346	0.12	584.608	78.7	171.9	26.6332	67.04	0.138	9.69	22.6873	1.22	0.2	3	27	11	10	1	8	0.1	0.9	0	0.9	2.25	3	9	29	1.7	8.2	6.5	15.33	6	7	7.5	35	63	69	51	30	16	8	1	0	51	36
7	Male			29.8514	225	102.058	0.18	368.59	99.3	175	32.4245	69.77	0.289	9.66	22.782	1.45	2.2	0	15	3.5	3.5	2	9	0.2	0.8	0	0.8	3	1	9	19	1.1	8.3	7.2	16.74	7.5	7.5	7.85	69	77	89	37	12	3	13	8	4	8	10
8	Male			31.9021	220	99.7903	0.13	415.273	80.3	162.5	30.4095	58.69	0.26	7.68	22.2258	1.182	-0.2	6	13	9	7	3	20	0.15	0.85	0	0.85	1.5	1	10	54	0.6	8.8	8.2	13.14	8	6	9	86	85	74	74	60	4	13	2	3	8	17
9	Male			26.6754	260	117.934	0.13	492.285	80	177	25.5354	64.62	0.18	9.35	20.6263	1.334	1.3	6	29	8	8	2	10	0.2	0.75	0.05	0.8	3	1	10	39	2.2	8.1	5.9	12.3	8	8.5	8.5	75	85	85	85	69	28	16	5	4	77	32
10	Female	skyla	15	26.5824	95	43.0913	0.1	395.6	55.3	168.2	19.5467	42.14	0.23	4.51	14.8951	1.234	1.5	4	27	8	2	2	5	0	1	0	1	3	3	14	69	1	7.6	6.6	16.06	8	8	8.5	54	65	75	36	54	12	2	0	0	73	39
11	Male			26.6672	220	99.7903	0.13	372.092	94.4	186.9	27.0242	78.27	0.154	10.44	22.4066	1.461	2.4	2	17	10	6	1	5	0	1	0	1	3	2	7	28	2.2	7.4	5.2	17.44	10	5.5	8.25	100	67	74	27	30	24	3	4	3	3	5
12	Female	none	21	21.8485	95	43.0913	0.22	371.21	67.1	166.6	24.1753	51.37	0.223	5.17	18.508	1.183	1.1	2	23	5	4	1	3	0	1	0	1	3	2	6	33	1.3	3	1.7	18.37	7	8	7.5	80	51	79	51	7	0	13	1	0	49	1
13	Male			18.9326	155	70.3068	0.07	293.07	80	187.6	22.7313	64.72	0.172	8.18	18.3896	1.203	0.2	5	25	1.5	1.5	2.5	12	0.125	0.875	0	0.875	2.5	1	7	19	0.5	5.7	5.2	17.34	7	6	5.5	66	73	84	36	43	14	11	33	13	8	11
14	Male			25.4598	210	95.2544	0.23	360.882	92.1	173.7	30.5253	69.48	0.23	9.55	23.0282	1.298	1	6	23	9	9	2	8	0.25	0.75	0	0.75	3	1	7	28	2.9	6.8	3.9	17.1	10	8	7.5	71	58	74	15	10	8	73	49	8	53	29
15	Female	mylin	30	21.635	90	40.8233	0.25	358.304	65.3	166.2	23.6402	49.55	0.226	4.88	17.9383	1.329	2.8	3	16	8	6	1.5	6	1	0	0	0	2.5	1	10	54	1	2.9	1.9	16.17	8	8	6.5	58	52	53	59	54	25	52	40	25	54	38
16	Male			24.11	270	122.47	0.12	487.804	85.5	168.5	30.1139	67.53	0.193	10.01	23.7847	1.246	0.5	6	27	8	6	2	12	0.166667	0.833333	0	0.833333	3	1	6	24	1.6	8.6	7	14.43	6.5	6	6	67	55	49	53	17	5	30	12	1	30	4
17	Female	none	1	34.1801	175	79.3787	0.1	581.845	82.1	164.6	30.3029	58.55	0.276	7.24	21.6106	1.261	1.5	4	13	27	4	2	20	0.3	0.7	0	0.7	3	3	8	99	1	4.4	3.4	12.61	9	8	8	72	71	91	52	70	3	17	6	3	81	52
18	Female	triprivifem	5	21.3612	165	74.8427	0.09	545.177	85.7	163.2	32.1766	55.72	0.334	6.65	20.9204	1.275	2.2	4	28	2.5	2.5	2	8	0.5	0.5	0	0.5	2.5	3	9	54	0.8	5.5	4.7	11.26	9	7	8	73	71	49	52	22	30	0	6	9	72	66
19	Male			21.6213	152	68.946	0.18	256.386	94.8	174.9	30.9905	63.83	0.315	8.75	20.8663	1.206	0.2	2	14	3	3	4	15	0.33333	0.666667	0	0.666667	4	3	11	39	1.3	4.9	3.6	12.87	11	7.5	9	75	48	67	9	10	9	24	13	4	69	32
20	Female	mirena	14	22.2619	122	55.3383	0.1	444.287	73	174.7	23.9187	54.52	0.242	6.59	17.8636	1.262	2	3	12	6	6	2	8	0.25	0.75	0	0.75	2	3	9	89	1.2	5.1	3.9	13.11	6.75	6.75	7	85	88	87	77	59	21	11	7	11	16	6
21	Female	microgestin	7	22.1935	120	54.4311	0.11	421.434	82.8	162.5	31.3562	52.81	0.353	5.81	19.9991	1.252	1.9	0	6	8	4	1	6	0.5	0.5	0	0.5	2	2	7	23	0.6	3.7	3.1	14.13	9	8	8	71	87	89	43	69	72	16	19	10	58	79
22	Female	none	1	30.1334	147	66.6781	0.08	536.132	67.1	166.1	24.3211	51.87	0.214	5.81	18.8008	1.277	1.8	2	18	7	6	1	8	0.125	0.875	0	0.875	2	3	8	43	1.7	4.7	3	14.42	7.5	11.3833	7.75	63	64	46	26	58	62	8	39	36	39	78
23	Male			30.4182	255	115.666	0.11	468.308	83.5	170.2	28.8249	68.56	0.172	9.64	23.6675	1.468	2.4	2	8	17	17	1	8	0.125	0.875	0	0.875	2	3	11	39	0.9	7.2	6.3	14.19	7	8.78333	8.01667	71	83	73	49	24	6	12	4	0	53	25
24	Female	none	14	25.0847	105	47.6272	0.09	376.728	83.9	184.5	24.6473	57.34	0.307	5.97	16.8448	1.213	1.3	4	19	2	2	2	10	0.25	0.75	0	0.75	2	1	11	59	1.1	3.8	2.7	14.81	7	8	7	76	40	64	39	63	17	18	11	12	75	31
25	Female	camrese	49	19.6938	100	45.3592	0.08	366.331	80.7	160	31.5234	48.92	0.385	5.33	19.1094	1.24	1.8	3	14	2	1.5	3	15	0.66667	0.333333	0	0.333333	5	1	8	29	0.6	4.3	3.7	14.15	8.25	8	11	79	81	87	68	28	8	32	19	27	12	32
26	Male			20.7588	265	120.202	0.08	508.739	78.5	173.3	26.138	64.61	0.167	9.73	21.5131	1.165	-0.2	3	21	6	6	1	4	0.25	0.5	0.25	0.75	2	3	6	13	1.5	7.5	6	15.67	7.5	7	8	76	79	80	10	24	25	13	24	5	12	41
27	Male			21.509	210	95.2544	0.17	432.95	71.4	171.2	24.3608	60.93	0.137	9.1	20.7885	1.25	0.6	2	18	6	4	1	10	0.05	0.9	0.05	0.95	2	2	11	34	2.9	7.3	4.4	13.77	7	3	8	56	18	69	35	36	47	0	1	0	4	1
28	Male			21.1257	215	97.5224	0.14	423.375	75.8	182.6	22.7336	63.13	0.157	8.51	18.9336	1.505	1.8	4	10	4	4	1	6	0.15	0.8	0.05	0.85	1.5	3	8	23	1	5.3	4.3	15.02	6	9	6	77	60	94	12	18	0	1	0	0	0	0
29	Female	none	20	25.9116	185	83.9146	0.16	610.311	82.3	179.2	25.6285	57.68	0.29	6.57	17.9618	1.336	2.6	2	21	8	8	1	7	0.9	0.1	0	0.1	3	3	9	19	1.1	7.1	6	12.74	8.5	8	9	70	80	79	65	53	21	7	0	0	3	0
32	Female	none	10	21.3666	80	36.2874	0.11	330.26	62.6	145	29.7741	40.38	0.35	3.74	19.2057	1.166	0.9	10	26	6	1	2	4	0.25	0.75	0	0.75	3	3	10	79	1.4	3.4	2	9.2	7	9	8	71	81	82	66	60	3	0	0	0	17	65
33	Female	nexplanon	n/a	25.2736	140	63.5029	0.15	498.514	73.3	174.5	24.0721	55.14	0.24	6.38	18.1082	1.274	2	4	24	6	5	1	4	0.5	0.5	0	0.5	3	3	11	49	0.8	5.2	4.4	14.24	8	8	9	74	16	75	79	34	7	51	25	6	78	36
34	Female	enskyce	21	24.3838	192	87.0897	0.08	656.863	73.3	166	26.6004	56.06	0.227	6.76	20.344	1.302	2.3	7	25	10	10	1	4	0	1	0	1	3	1	8	39	1.1	4.8	3.7	13.19	6	8	7	36	63	77	42	18	4	7	4	0	10	0
35	Male			22.878	335	151.953	0.14	603.916	85.8	177.5	27.2327	74.61	0.124	10.73	23.681	1.376	1.7	4	15	10	10	2.5	10	0.2	0.8	0	0.8	1	1	8	24	1.7	6.8	5.1	15.44	7.5	5	6	57	31	30	42	30	11	4	33	10	65	67
36	Female	none	26	23.6555	67	30.3907	0.17	294.993	57.2	170.4	19.6996	40.89	0.281	4.18	14.0824	1.051	-0.7	1	21	1.5	1.5	2	6	0.1	0.8	0.1	0.9	2	3	11	89	1.3	3.9	2.6	17.91	8	7	7.5	69	70	81	71	64	19	20	13	5	54	44
37	Male			20.0388	190	86.1826	0.16	412.676	66.9	164.3	24.7828	55.5	0.158	7.38	20.5598	1.223	0.4	5	17	4	4	2	10	0.9	0.1	0	0.1	2	3	10	29	1	10.1	9.1	12.84	6	5	6	78	85	85	45	6	1	0	0	0	0	0
38	Male			22.3222	150	68.0389	0.11	280.113	81.4	180.5	24.9845	61.35	0.24	7.83	18.8304	1.294	1	6	18	3.5	3.5	1.5	5	0.2	0.8	0	0.8	0.625	3	9	27	1.3	5.8	4.5	16.36	6	6	6	61	47	64	70	15	0	11	0	0	15	0
39	Female	jolessa	42	21.8896	175	79.3787	0.09	582.8	81.7	175.3	26.5863	63.36	0.222	7.77	20.6182	1.094	-0.1	2	9	4	4	2	14	0.571429	0.428571	0	0.428571	2	3	9	69	1.7	3.9	2.2	12.41	6	8.5	8.5	51	70	82	21	23	7	1	13	4	8	1
40	Male			27.9513	260	117.934	0.14	484.912	81.7	168.4	28.8096	65.3	0.189	9.62	23.0266	1.299	0.9	6	27	15	14	1	5	0.3	0.7	0	0.7	1.5	1	7	18	1.3	6.2	4.9	14.05	7	7	5	44	49	21	36	37	7	4	12	2	6	15
41	Female	trisprintec	28	20.6356	115	52.1631	0.15	462.572	56.2	156.4	22.9754	41	0.262	4.51	16.7614	1.209	1.4	3	28	3.5	3	1	7	0.571429	0.428571	0	0.428571	2	3	11	53	0.6	5.4	4.8	10.74	9	9	9	74	29	61	43	15	3	2	1	0	73	44
42	Female	nexplanon	14	20.2906	130	58.967	0.15	441.357	88.5	163.7	33.0252	57.32	0.345	6.95	21.3899	1.313	1.6	4	24	5	5	2	6	0.1	0.8	0.1	0.9	1	3	5	23	1.3	4.9	3.6	13.88	8.5	6.5	6	78	55	73	59	23	5	28	18	6	65	35
43	Male			21.5775	195	88.4505	0.08	377.229	77.6	168.4	27.3639	58.25	0.244	7.02	20.5405	1.154	-0.4	5	24	4	4	2.5	10	0.1	0.8	0.1	0.9	0.333333	1	9	28	0.9	5.9	5	15.65	8.5	8.5	7.5	59	76	76	77	84	84	22	7	2	80	52
44	Female	morena	n/a	28.644	115	52.1631	0.09	427.663	70.5	165.8	25.646	49.48	0.292	5.3	17.9995	1.264	1.7	1	21	6	6	1	5	0.1	0.8	0.1	0.9	3	2	7	64	0.5	5.1	4.6	13.06	7.75	8.5	7.5	84	89	67	59	12	0	0	0	0	72	53
[truncated: 44 more columns]

## Sheet: Fatigue Protocol
Subject	Sex	Set	Rep 1 velocity	Rep 2 velocity	Rep 3 velocity	Rep 4 velocity	Rep 5 velocity	Velocity loss during set (fastest vs. slowest rep)	Velocity recovery between sets (slowest rep in previous set vs. fastest rep in subsequent set)	Sets completed	Reps completed
1	male	1	0.32	0.29	0.26	0.28	0.23	0.09		4	22
1	male	2	0.28	0.28	0.24	0.22	0.21	0.07	0.05
1	male	3	0.23	0.23	0.2	0.17	0.12	0.11	0.02
1	male	4	0.27	0.28	0.22	0.19	0.12	0.16	0.16
1	male	5	0.23	0.21					0.11
2	male	1	0.34	0.37	0.32	0.3	0.38	0.08		6	33
2	male	2	0.35	0.4	0.36	0.3	0.31	0.1	0.1
2	male	3	0.28	0.31	0.32	0.27	0.22	0.1	0.02
2	male	4	0.28	0.32	0.33	0.24	0.15	0.18	0.11
2	male	5	0.28	0.3	0.21	0.24	0.16	0.14	0.15
2	male	6	0.22	0.28	0.21	0.18	0.11	0.17	0.12
2	male	7	0.17	0.26	0.16				0.15
3	female	1	0.55	0.49	0.44	0.43	0.41	0.14		12	64
3	female	2	0.49	0.46	0.41	0.4	0.37	0.12	0.08
3	female	3	0.54	0.48	0.45	0.39	0.36	0.18	0.17
3	female	4	0.52	0.47	0.42	0.36	0.33	0.19	0.16
3	female	5	0.51	0.49	0.43	0.37	0.33	0.18	0.18
3	female	6	0.52	0.44	0.39	0.37	0.31	0.21	0.19
3	female	7	0.48	0.42	0.37	0.32	0.28	0.2	0.17
3	female	8	0.5	0.42	0.38	0.33	0.28	0.22	0.22
3	female	9	0.43	0.4	0.36	0.29	0.24	0.19	0.15
3	female	10	0.49	0.4	0.37	0.31	0.24	0.25	0.25
3	female	11	0.41	0.37	0.35	0.25	0.19	0.22	0.17
3	female	12	0.39	0.38	0.3	0.24	0.15	0.24	0.2
3	female	13	0.36	0.33	0.29	0.2			0.21
4	male	1	0.49	0.38	0.35	0.35	0.34	0.15		10	53
4	male	2	0.39	0.36	0.32	0.28	0.33	0.11	0.05
4	male	3	0.39	0.35	0.26	0.29	0.26	0.13	0.11
4	male	4	0.36	0.35	0.28	0.28	0.25	0.11	0.1
4	male	5	0.33	0.33	0.32	0.29	0.25	0.08	0.08
4	male	6	0.35	0.3	0.3	0.25	0.16	0.19	0.1
4	male	7	0.33	0.35	0.27	0.24	0.19	0.16	0.19
4	male	8	0.26	0.33	0.3	0.26	0.2	0.13	0.14
4	male	9	0.26	0.3	0.25	0.21	0.17	0.13	0.1
4	male	10	0.26	0.27	0.27	0.22	0.15	0.12	0.1
4	male	11	0.2	0.2	0.16				0.05
5	female	1	0.42	0.42	0.38	0.31	0.31	0.11		24	124
5	female	2	0.39	0.39	0.35	0.34	0.32	0.07	0.08
5	female	3	0.38	0.39	0.38	0.33	0.3	0.09	0.07
5	female	4	0.39	0.37	0.36	0.33	0.31	0.08	0.09
5	female	5	0.41	0.4	0.37	0.33	0.31	0.1	0.1
5	female	6	0.38	0.4	0.39	0.3	0.31	0.1	0.09
5	female	7	0.4	0.35	0.35	0.3	0.27	0.13	0.1
5	female	8	0.41	0.39	0.35	0.31	0.28	0.13	0.14
5	female	9	0.4	0.36	0.33	0.3	0.29	0.11	0.12
5	female	10	0.4	0.36	0.32	0.3	0.26	0.14	0.11
5	female	11	0.37	0.37	0.33	0.24	0.24	0.13	0.11
5	female	12	0.4	0.42	0.35	0.32	0.24	0.18	0.18
5	female	13	0.37	0.37	0.34	0.28	0.25	0.12	0.13
5	female	14	0.4	0.37	0.31	0.28	0.27	0.13	0.15
5	female	15	0.38	0.36	0.3	0.28	0.24	0.14	0.11
5	female	16	0.37	0.38	0.29	0.27	0.2	0.18	0.14
5	female	17	0.38	0.34	0.32	0.28	0.23	0.15	0.18
5	female	18	0.38	0.35	0.29	0.25	0.17	0.21	0.15
5	female	19	0.36	0.34	0.26	0.24	0.17	0.19	0.19
5	female	20	0.34	0.31	0.29	0.24	0.2	0.14	0.17
5	female	21	0.32	0.31	0.26	0.26	0.18	0.14	0.12
5	female	22	0.36	0.33	0.25	0.21	0.15	0.21	0.18
5	female	23	0.35	0.32	0.28	0.23	0.13	0.22	0.2
5	female	24	0.32	0.29	0.25	0.2	0.07	0.25	0.19
5	female	25	0.31	0.28	0.21	0.14			0.24
6	male	1	0.39	0.36	0.35	0.33	0.33	0.06		5	29
6	male	2	0.41	0.32	0.34	0.3	0.27	0.14	0.08
6	male	3	0.38	0.37	0.28	0.27	0.24	0.14	0.11
6	male	4	0.29	0.33	0.3	0.25	0.25	0.08	0.09
6	male	5	0.31	0.32	0.23	0.22	0.16	0.16	0.07
6	male	6	0.3	0.3	0.2	0.19			0.14
7	male	1	0.45	0.48	0.47	0.4	0.4	0.08		3	19
7	male	2	0.53	0.44	0.39	0.36	0.3	0.23	0.13
7	male	3	0.46	0.4	0.36	0.31	0.23	0.23	0.16
7	male	4	0.42	0.39	0.3	0.23			0.19
8	male	1	0.4	0.34	0.36	0.28	0.29	0.12		10	54
8	male	2	0.37	0.38	0.31	0.29	0.26	0.12	0.1
8	male	3	0.4	0.35	0.3	0.33	0.26	0.14	0.14
8	male	4	0.37	0.35	0.35	0.25	0.26	0.12	0.11
8	male	5	0.34	0.35	0.3	0.28	0.24	0.11	0.1
8	male	6	0.36	0.35	0.35	0.31	0.2	0.16	0.12
8	male	7	0.32	0.31	0.29	0.25	0.19	0.13	0.12
8	male	8	0.28	0.29	0.27	0.25	0.14	0.15	0.1
8	male	9	0.29	0.26	0.26	0.22	0.17	0.12	0.15
8	male	10	0.28	0.25	0.23	0.15	0.1	0.18	0.11
8	male	11	0.23	0.22	0.2	0.13			0.13
9	male	1	0.48	0.42	0.38	0.37	0.34	0.14		7	39
9	male	2	0.48	0.44	0.38	0.36	0.33	0.15	0.14
9	male	3	0.43	0.39	0.34	0.31	0.29	0.14	0.1
9	male	4	0.42	0.37	0.33	0.3	0.26	0.16	0.13
9	male	5	0.38	0.37	0.32	0.25	0.23	0.15	0.12
9	male	6	0.35	0.33	0.28	0.22	0.2	0.15	0.12
9	male	7	0.33	0.3	0.25	0.18	0.14	0.19	0.13
9	male	8	0.28	0.3	0.25	0.16			0.16
10	female	1	0.44	0.43	0.35	0.36	0.29	0.15		13	69
10	female	2	0.4	0.35	0.32	0.26	0.23	0.17	0.11
10	female	3	0.44	0.34	0.3	0.27	0.21	0.23	0.21
10	female	4	0.47	0.41	0.31	0.27	0.17	0.3	0.26
10	female	5	0.39	0.37	0.32	0.23	0.24	0.16	0.22
10	female	6	0.36	0.36	0.29	0.2	0.21	0.16	0.13
10	female	7	0.38	0.34	0.28	0.21	0.22	0.17	0.18
10	female	8	0.33	0.29	0.29	0.26	0.17	0.16	0.12
10	female	9	0.34	0.32	0.29	0.18	0.17	0.17	0.17
10	female	10	0.33	0.3	0.25	0.2	0.13	0.2	0.16
10	female	11	0.36	0.3	0.28	0.19	0.13	0.23	0.23
10	female	12	0.29	0.28	0.26	0.15	0.16	0.14	0.16
10	female	13	0.28	0.25	0.24	0.1	0.08	0.2	0.13
10	female	14	0.3	0.28	0.24	0.09			0.22
11	male	1	0.51	0.44	0.49	0.35	0.35	0.16		5	28
11	male	2	0.48	0.49	0.41	0.37	0.35	0.14	0.14
11	male	3	0.47	0.39	0.32	0.32	0.26	0.21	0.12
11	male	4	0.37	0.39	0.34	0.28	0.2	0.19	0.13
11	male	5	0.37	0.34	0.34	0.27	0.15	0.22	0.17
11	male	6	0.32	0.28	0.2				0.17
12	female	1	0.59	0.53	0.46	0.45	0.41	0.18		6	33
12	female	2	0.56	0.52	0.47	0.47	0.37	0.19	0.15
12	female	3	0.57	0.5	0.49	0.38	0.37	0.2	0.2
12	female	4	0.51	0.47	0.44	0.37	0.32	0.19	0.14
12	female	5	0.51	0.4	0.38	0.36	0.31	0.2	0.19
12	female	6	0.39	0.35	0.35	0.31	0.27	0.12	0.08
12	female	7	0.36	0.32	0.32				0.09
13	male	1	0.51	0.38	0.37	0.35	0.25	0.26		3	19
13	male	2	0.39	0.33	0.25	0.26	0.22	0.17	0.14
13	male	3	0.41	0.3	0.26	0.19	0.14	0.27	0.19
13	male	4	0.33	0.28	0.15	0.07			0.19
14	male	1	0.58	0.58	0.51	0.48	0.44	0.14		5	28
14	male	2	0.48	0.46	0.41	0.32	0.33	0.16	0.04
14	male	3	0.54	0.53	0.46	0.4	0.34	0.2	0.22
14	male	4	0.45	0.47	0.44	0.37	0.3	0.17	0.13
14	male	5	0.49	0.39	0.37	0.3	0.15	0.34	0.19
14	male	6	0.45	0.38	0.2				0.3
15	female	1	0.58	0.55	0.47	0.46	0.4	0.18		10	54
15	female	2	0.57	0.46	0.47	0.4	0.39	0.18	0.17
15	female	3	0.51	0.52	0.4	0.4	0.41	0.12	0.13
15	female	4	0.55	0.47	0.39	0.38	0.33	0.22	0.15
15	female	5	0.56	0.52	0.45	0.39	0.36	0.2	0.23
15	female	6	0.56	0.51	0.43	0.38	0.33	0.23	0.2
15	female	7	0.52	0.44	0.4	0.35	0.29	0.23	0.19
15	female	8	0.54	0.47	0.39	0.33	0.25	0.29	0.25
15	female	9	0.49	0.47	0.31	0.36	0.27	0.22	0.24
15	female	10	0.46	0.43	0.37	0.3	0.21	0.25	0.19
15	female	11	0.49	0.47	0.35	0.29			0.28
16	male	1	0.44	0.41	0.42	0.4	0.38	0.06		4	24
16	male	2	0.41	0.41	0.37	0.35	0.33	0.08	0.03
16	male	3	0.4	0.38	0.35	0.32	0.29	0.11	0.07
16	male	4	0.4	0.36	0.36	0.3	0.22	0.18	0.11
16	male	5	0.36	0.34	0.25	0.19			0.14
17	female	1	0.35	0.28	0.32	0.28	0.32	0.07		19	99
17	female	2	0.33	0.33	0.31	0.26	0.25	0.08	0.05
17	female	3	0.31	0.3	0.3	0.26	0.28	0.05	0.06
17	female	4	0.27	0.29	0.29	0.22	0.27	0.07	0.03
17	female	5	0.33	0.33	0.32	0.29	0.24	0.09	0.11
17	female	6	0.31	0.31	0.33	0.28	0.23	0.1	0.09
17	female	7	0.3	0.31	0.31	0.24	0.23	0.08	0.08
17	female	8	0.29	0.29	0.3	0.24	0.23	0.07	0.07
17	female	9	0.3	0.31	0.31	0.23	0.24	0.08	0.08
17	female	10	0.24	0.33	0.32	0.27	0.27	0.09	0.1
17	female	11	0.26	0.32	0.31	0.27	0.22	0.1	0.08
17	female	12	0.29	0.31	0.29	0.23	0.15	0.16	0.09
17	female	13	0.31	0.32	0.31	0.27	0.2	0.12	0.17
17	female	14	0.27	0.32	0.3	0.25	0.18	0.14	0.12
17	female	15	0.23	0.29	0.32	0.24	0.15	0.17	0.14
17	female	16	0.31	0.3	0.27	0.26	0.18	0.13	0.16
17	female	17	0.31	0.3	0.28	0.24	0.19	0.12	0.13
17	female	18	0.28	0.31	0.27	0.27	0.2	0.11	0.12
17	female	19	0.24	0.3	0.29	0.19	0.15	0.15	0.1
17	female	20	0.26	0.29	0.27	0.16			0.14
18	female	1	0.31	0.31	0.3	0.26	0.26	0.05		10	54
18	female	2	0.35	0.33	0.26	0.2	0.2	0.15	0.09
18	female	3	0.29	0.22	0.28	0.23	0.19	0.1	0.09
18	female	4	0.4	0.32	0.29	0.26	0.19	0.21	0.21
18	female	5	0.28	0.3	0.26	0.24	0.18	0.12	0.11
18	female	6	0.3	0.29	0.26	0.25	0.19	0.11	0.12
18	female	7	0.3	0.27	0.21	0.24	0.14	0.16	0.11
18	female	8	0.26	0.24	0.19	0.22	0.1	0.16	0.12
18	female	9	0.27	0.25	0.21	0.19	0.13	0.14	0.17
18	female	10	0.25	0.19	0.16	0.18	0.12	0.13	0.12
18	female	11	0.21	0.2	0.17	0.09			0.09
19	male	1	0.45	0.42	0.39	0.36	0.28	0.17		7	39
19	male	2	0.4	0.39	0.36	0.34	0.34	0.06	0.12
19	male	3	0.41	0.38	0.36	0.31	0.25	0.16	0.07
19	male	4	0.4	0.33	0.3	0.28	0.26	0.14	0.15
19	male	5	0.39	0.35	0.32	0.25	0.23	0.16	0.13
19	male	6	0.36	0.32	0.3	0.25	0.25	0.11	0.13
19	male	7	0.3	0.33	0.23	0.22	0.16	0.17	0.08
19	male	8	0.33	0.28	0.21	0.18			0.17
20	female	1	0.45	0.41	0.39	0.34	0.34	0.11		17	89
20	female	2	0.46	0.38	0.34	0.32	0.25	0.21	0.12
20	female	3	0.4	0.39	0.34	0.3	0.28	0.12	0.15
20	female	4	0.43	0.35	0.31	0.33	0.27	0.16	0.15
20	female	5	0.36	0.39	0.29	0.28	0.23	0.16	0.12
20	female	6	0.42	0.38	0.35	0.31	0.28	0.14	0.19
20	female	7	0.42	0.4	0.37	0.27	0.25	0.17	0.14
20	female	8	0.41	0.34	0.35	0.31	0.25	0.16	0.16
20	female	9	0.38	0.38	0.35	0.3	0.25	0.13	0.13
20	female	10	0.4	0.34	0.29	0.32	0.27	0.13	0.15
20	female	11	0.38	0.35	0.28	0.29	0.25	0.13	0.11
20	female	12	0.39	0.31	0.33	0.29	0.2	0.19	0.14
20	female	13	0.33	0.33	0.3	0.24	0.19	0.14	0.13
20	female	14	0.29	0.31	0.29	0.22	0.17	0.14	0.12
20	female	15	0.32	0.34	0.25	0.19	0.15	0.19	0.17
20	female	16	0.3	0.28	0.27	0.2	0.12	0.18	0.15
20	female	17	0.31	0.29	0.27	0.2	0.09	0.22	0.19
20	female	18	0.25	0.22	0.19	0.1			0.16
21	female	1	0.48	0.39	0.36	0.36	0.29	0.19		4	23
21	female	2	0.31	0.34	0.33	0.3	0.23	0.11	0.05
21	female	3	0.37	0.34	0.27	0.26	0.19	0.18	0.14
21	female	4	0.37	0.31	0.23	0.24	0.14	0.23	0.18
21	female	5	0.25	0.27	0.17				0.13
22	female	1	0.42	0.4	0.35	0.32	0.31	0.11		8	43
22	female	2	0.41	0.34	0.33	0.3	0.23	0.18	0.1
22	female	3	0.37	0.33	0.28	0.22	0.18	0.19	0.14
22	female	4	0.36	0.34	0.31	0.26	0.2	0.16	0.18
22	female	5	0.42	0.31	0.23	0.24	0.19	0.23	0.22
22	female	6	0.36	0.26	0.27	0.17	0.14	0.22	0.17
22	female	7	0.33	0.29	0.25	0.18	0.13	0.2	0.19
22	female	8	0.31	0.25	0.23	0.17	0.11	0.2	0.18
22	female	9	0.21	0.21	0.21				0.1
23	male	1	0.45	0.47	0.4	0.35	0.41	0.12		7	39
23	male	2	0.46	0.44	0.38	0.38	0.39	0.08	0.11
23	male	3	0.46	0.47	0.4	0.36	0.34	0.13	0.09
23	male	4	0.48	0.45	0.39	0.36	0.32	0.16	0.14
23	male	5	0.4	0.4	0.37	0.34	0.3	0.1	0.08
23	male	6	0.39	0.4	0.37	0.3	0.25	0.15	0.1
23	male	7	0.35	0.37	0.3	0.27	0.13	0.24	0.12
23	male	8	0.29	0.35	0.25	0.13			0.22
24	female	1	0.29	0.29	0.28	0.26	0.25	0.04		11	59
24	female	2	0.31	0.25	0.22	0.21	0.2	0.11	0.06
24	female	3	0.3	0.27	0.24	0.24	0.24	0.06	0.1
24	female	4	0.26	0.24	0.22	0.19	0.22	0.07	0.02
24	female	5	0.32	0.28	0.24	0.22	0.21	0.11	0.13
24	female	6	0.31	0.29	0.24	0.24	0.22	0.09	0.1
24	female	7	0.26	0.25	0.25	0.23	0.21	0.05	0.04
24	female	8	0.28	0.26	0.28	0.22	0.22	0.06	0.07
24	female	9	0.25	0.29	0.22	0.24	0.18	0.11	0.07
24	female	10	0.25	0.25	0.24	0.21	0.13	0.12	0.07
24	female	11	0.23	0.24	0.23	0.12			0.11
24	female	12
25	female	1	0.46	0.44	0.41	0.41	0.32	0.14		5	29
25	female	2	0.41	0.33	0.35	0.25	0.3	0.16	0.09
25	female	3	0.38	0.39	0.34	0.27	0.25	0.14	0.14
25	female	4	0.49	0.37	0.3	0.26	0.24	0.25	0.24
25	female	5	0.34	0.34	0.3	0.16	0.15	0.19	0.1
25	female	6	0.37	0.38	0.3	0.16			0.23
26	male	1	0.41	0.32	0.32	0.28	0.25	0.16		2	13
26	male	2	0.34	0.28	0.27	0.23	0.2	0.14	0.09
26	male	3	0.26	0.2	0.09				0.06
27	male	1	0.36	0.3	0.24	0.33	0.2	0.16		6	34
27	male	2	0.39	0.26	0.24	0.26	0.24	0.15	0.19
27	male	3	0.36	0.27	0.26	0.29	0.21	0.15	0.12
27	male	4	0.28	0.26	0.25	0.21	0.19	0.09	0.07
27	male	5	0.29	0.21	0.23	0.2	0.21	0.09	0.1
27	male	6	0.24	0.25	0.24	0.16	0.12	0.13	0.05
27	male	7	0.23	0.23	0.21	0.08			0.11
28	male	1	0.46	0.37	0.33	0.35	0.29	0.17		4	23
28	male	2	0.41	0.36	0.31	0.29	0.25	0.16	0.12
28	male	3	0.36	0.33	0.29	0.24	0.19	0.17	0.11
28	male	4	0.31	0.28	0.24	0.16	0.14	0.17	0.12
28	male	5	0.27	0.23	0.08				0.13
29	female	1	0.4	0.39	0.32	0.33	0.24	0.16		3	19
29	female	2	0.36	0.35	0.29	0.27	0.26	0.1	0.12
29	female	3	0.36	0.36	0.29	0.24	0.22	0.14	0.1
29	female	4	0.33	0.3	0.19	0.14			0.11
32	female	1	0.38	0.36	0.28	0.29	0.25	0.13		15	79
32	female	2	0.35	0.3	0.27	0.27	0.24	0.11	0.1
32	female	3	0.36	0.3	0.27	0.2	0.24	0.16	0.12
32	female	4	0.34	0.27	0.29	0.2	0.24	0.14	0.14
32	female	5	0.34	0.27	0.23	0.23	0.18	0.16	0.14
32	female	6	0.3	0.24	0.28	0.23	0.14	0.16	0.12
32	female	7	0.31	0.2	0.21	0.18	0.15	0.16	0.17
32	female	8	0.28	0.24	0.21	0.2	0.16	0.12	0.13
32	female	9	0.3	0.25	0.25	0.25	0.15	0.15	0.14
32	female	10	0.31	0.22	0.23	0.17	0.22	0.14	0.16
32	female	11	0.3	0.27	0.25	0.17	0.16	0.14	0.13
32	female	12	0.29	0.27	0.22	0.2	0.15	0.14	0.13
32	female	13	0.26	0.19	0.18	0.17	0.1	0.16	0.11
32	female	14	0.29	0.23	0.22	0.14	0.1	0.19	0.19
32	female	15	0.17	0.18	0.19	0.14	0.14	0.05	0.09
32	female	16	0.27	0.24	0.24	0.13			0.13
33	female	1	0.48	0.47	0.38	0.39	0.36	0.12		9	49
33	female	2	0.45	0.4	0.36	0.37	0.32	0.13	0.09
33	female	3	0.46	0.46	0.37	0.31	0.28	0.18	0.14
33	female	4	0.42	0.43	0.38	0.32	0.26	0.17	0.15
33	female	5	0.45	0.43	0.37	0.33	0.25	0.2	0.19
33	female	6	0.41	0.42	0.38	0.28	0.24	0.18	0.17
33	female	7	0.42	0.37	0.32	0.25	0.19	0.23	0.18
33	female	8	0.37	0.36	0.33	0.18	0.15	0.22	0.18
33	female	9	0.33	0.4	0.37	0.19	0.11	0.29	0.25
33	female	10	0.34	0.38	0.27	0.17			0.27
34	female	1	0.39	0.36	0.34	0.34	0.32	0.07		7	39
34	female	2	0.4	0.34	0.27	0.28	0.23	0.17	0.08
34	female	3	0.36	0.32	0.27	0.26	0.21	0.15	0.13
34	female	4	0.34	0.33	0.28	0.2	0.17	0.17	0.13
34	female	5	0.33	0.28	0.22	0.16	0.14	0.19	0.16
34	female	6	0.3	0.26	0.2	0.19	0.11	0.19	0.16
34	female	7	0.22	0.21	0.18	0.15	0.11	0.11	0.11
34	female	8	0.22	0.2	0.12	0.09			0.11
35	male	1	0.45	0.41	0.34	0.33	0.3	0.15		4	24
35	male	2	0.41	0.4	0.36	0.26	0.25	0.16	0.11
35	male	3	0.42	0.37	0.34	0.26	0.24	0.18	0.17
35	male	4	0.3	0.36	0.28	0.24	0.18	0.18	0.12
35	male	5	0.31	0.3	0.23	0.18			0.13
36	female	1	0.55	0.49	0.48	0.49	0.47	0.08		17	89
36	female	2	0.49	0.47	0.45	0.42	0.39	0.1	0.02
36	female	3	0.54	0.5	0.42	0.43	0.37	0.17	0.15
36	female	4	0.51	0.46	0.47	0.39	0.37	0.14	0.14
36	female	5	0.41	0.46	0.4	0.37	0.32	0.14	0.09
36	female	6	0.51	0.41	0.42	0.43	0.36	0.15	0.19
36	female	7	0.44	0.38	0.44	0.36	0.32	0.12	0.08
36	female	8	0.45	0.44	0.43	0.35	0.32	0.13	0.13
36	female	9	0.46	0.43	0.41	0.37	0.3	0.16	0.14
36	female	10	0.46	0.43	0.41	0.36	0.28	0.18	0.16
36	female	11	0.45	0.47	0.35	0.34	0.29	0.18	0.19
36	female	12	0.46	0.39	0.38	0.31	0.26	0.2	0.17
36	female	13	0.47	0.4	0.41	0.32	0.27	0.2	0.21
36	female	14	0.47	0.4	0.41	0.32	0.25	0.22	0.2
36	female	15	0.45	0.45	0.38	0.3	0.2	0.25	0.2
36	female	16	0.37	0.4	0.32	0.26	0.19	0.21	0.2
36	female	17	0.44	0.37	0.35	0.26	0.15	0.29	0.25
36	female	18	0.4	0.32	0.27	0.21			0.25
37	male	1	0.43	0.41	0.36	0.33	0.35	0.1		5	29
37	male	2	0.43	0.38	0.31	0.27	0.25	0.18	0.1
37	male	3	0.35	0.26	0.32	0.31	0.25	0.1	0.1
37	male	4	0.36	0.29	0.3	0.23	0.14	0.22	0.11
37	male	5	0.26	0.26	0.18	0.17	0.13	0.13	0.12
37	male	6	0.28	0.28	0.16	0.13			0.15
38	male	1	0.46	0.41	0.34	0.31	0.34	0.15		5	27
38	male	2	0.49	0.46	0.39	0.34	0.31	0.18	0.18
38	male	3	0.42	0.36	0.3	0.3	0.25	0.17	0.11
38	male	4	0.37	0.27	0.31	0.24	0.19	0.18	0.12
38	male	5	0.33	0.31	0.24	0.13	0.09	0.24	0.14
38	male	6	0.25	0.17					0.16
39	female	1	0.39	0.35	0.32	0.33	0.33	0.07		13	69
39	female	2	0.39	0.37	0.31	0.29	0.27	0.12	0.07
39	female	3	0.4	0.39	0.31	0.26	0.23	0.17	0.13
39	female	4	0.36	0.36	0.33	0.27	0.25	0.11	0.13
39	female	5	0.41	0.38	0.34	0.3	0.23	0.18	0.16
39	female	6	0.34	0.35	0.29	0.27	0.23	0.12	0.12
39	female	7	0.35	0.35	0.29	0.25	0.18	0.17	0.12
39	female	8	0.36	0.33	0.3	0.23	0.21	0.15	0.18
39	female	9	0.33	0.28	0.3	0.21	0.18	0.15	0.12
39	female	10	0.32	0.3	0.26	0.21	0.19	0.13	0.14
39	female	11	0.31	0.29	0.28	0.2	0.18	0.13	0.12
39	female	12	0.3	0.32	0.26	0.21	0.15	0.17	0.14
39	female	13	0.29	0.28	0.22	0.18	0.07	0.22	0.14
39	female	14	0.27	0.27	0.23	0.16			0.2
40	male	1	0.52	0.47	0.44	0.39	0.28	0.24		3	18
40	male	2	0.45	0.39	0.32	0.25	0.2	0.25	0.17
40	male	3	0.46	0.37	0.32	0.19	0.13	0.33	0.26
40	male	4	0.34	0.26	0.07				0.21
41	female	1	0.38	0.38	0.34	0.37	0.34	0.04		10	53
41	female	2	0.36	0.36	0.35	0.31	0.24	0.12	0.02
41	female	3	0.37	0.37	0.35	0.32	0.26	0.11	0.13
41	female	4	0.38	0.37	0.35	0.3	0.28	0.1	0.12
41	female	5	0.35	0.31	0.29	0.29	0.22	0.13	0.07
41	female	6	0.34	0.34	0.3	0.3	0.23	0.11	0.12
41	female	7	0.33	0.32	0.28	0.24	0.21	0.12	0.1
41	female	8	0.35	0.33	0.28	0.24	0.14	0.21	0.14
41	female	9	0.33	0.33	0.26	0.16	0.17	0.17	0.19
41	female	10	0.3	0.31	0.24	0.16	0.09	0.22	0.15
41	female	11	0.3	0.3	0.25				0.21
42	female	1	0.41	0.31	0.19	0.24	0.13	0.28		4	23
42	female	2	0.5	0.42	0.31	0.4	0.24	0.26	0.37
42	female	3	0.42	0.3	0.4	0.32	0.21	0.21	0.18
42	female	4	0.38	0.33	0.26	0.2	0.17	0.21	0.17
42	female	5	0.33	0.22	0.16				0.16
43	male	1	0.47	0.4	0.4	0.38	0.33	0.14		5	28
43	male	2	0.43	0.4	0.33	0.3	0.26	0.17	0.1
43	male	3	0.39	0.38	0.34	0.25	0.21	0.18	0.13
43	male	4	0.31	0.3	0.26	0.19	0.15	0.16	0.1
43	male	5	0.25	0.26	0.2	0.16	0.1	0.16	0.11
43	male	6	0.21	0.23	0.09				0.13
44	female	1	0.38	0.31	0.36	0.22	0.27	0.16		12	64
44	female	2	0.37	0.35	0.38	0.27	0.22	0.16	0.16
44	female	3	0.39	0.28	0.26	0.25	0.24	0.15	0.17
44	female	4	0.34	0.3	0.35	0.24	0.2	0.15	0.11
44	female	5	0.41	0.37	0.34	0.25	0.25	0.16	0.21
44	female	6	0.34	0.31	0.25	0.14	0.2	0.2	0.09
44	female	7	0.41	0.32	0.33	0.34	0.25	0.16	0.27
44	female	8	0.37	0.41	0.29	0.31	0.19	0.22	0.16
44	female	9	0.34	0.36	0.31	0.27	0.18	0.18	0.17
44	female	10	0.35	0.37	0.31	0.32	0.21	0.16	0.19
44	female	11	0.38	0.32	0.31	0.31	0.11	0.27	0.17
44	female	12	0.36	0.38	0.35	0.32	0.15	0.23	0.27
44	female	13	0.31	0.28	0.3	0.25			0.16
